# Supplementary material
Source: Springer Nature journal article supplement (https://www.springermedizin.de/resource/supplementary/13034_2013_258_MOESM1_ESM.pdf/9652656)

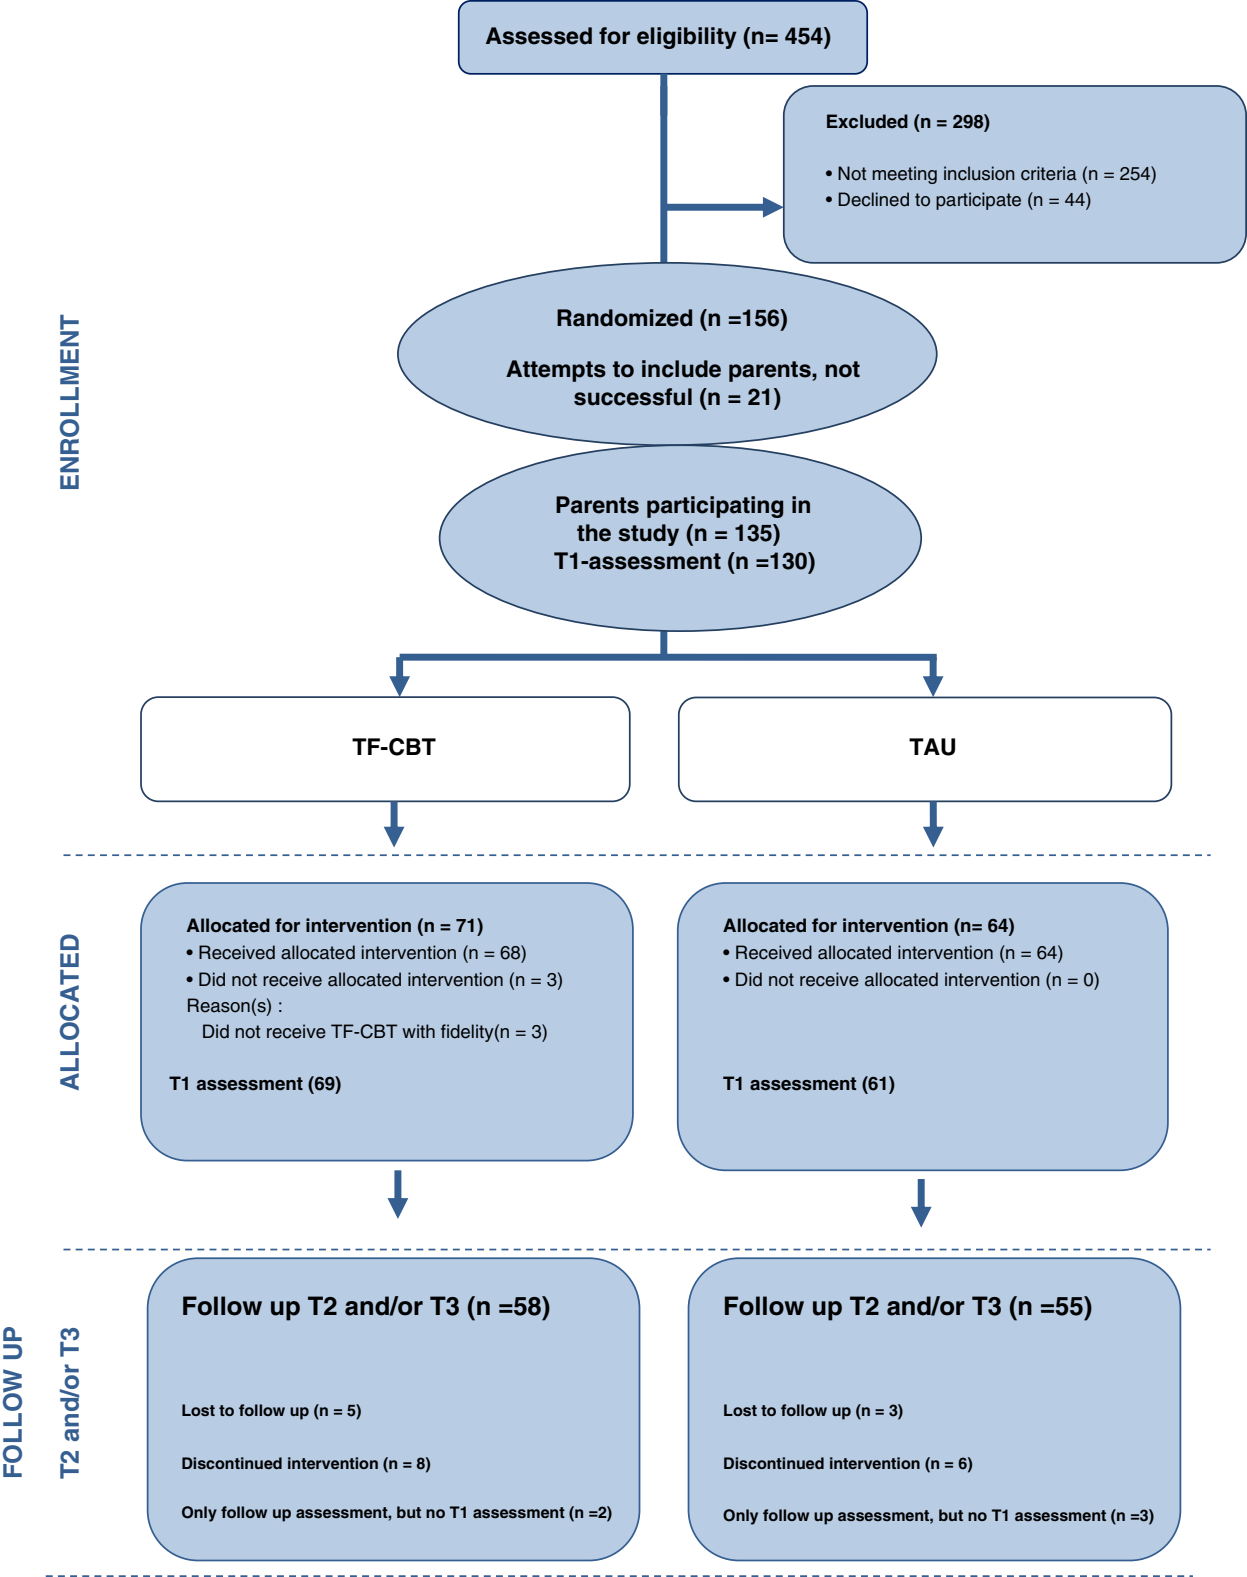

Supplement: MOESM1 [file 9652656]
